# Supplementary material for: A single dose of eHSP72 attenuates sepsis severity in mice
Source: PubMed Central journal article supplement (PMC7280184; doi:10.1038/s41598-020-66011-y), 2020-06-08

## A single dose of eHSP72 administration attenuates sepsis severity in mice

Maicon Machado Sulzbacher<sup>1,2\*</sup>, Lucas Machado Sulzbacher<sup>1</sup>, Felipe Rafael Passos<sup>1</sup>, Bruna Letícia Endl Bilibio<sup>1,2</sup>, Wellington Althaus<sup>1</sup>, Luana Weizenmann<sup>1</sup>, Kauana de Oliveira<sup>1</sup>, Matias Nunes Frizzo<sup>1,2</sup>, Mirna Stela Ludwig<sup>1,2</sup>, Thiago Gomes Heck<sup>1,2</sup>

<sup>1</sup>Research Group in Physiology, Department of Life Sciences, Regional University of Northwestern Rio Grande do Sul State (UNIJUÍ), Ijuí, RS, Brazil.

<sup>2</sup>Postgraduate Program in Integral Attention to Health (PPGAIS-UNIJUÍ/UNICRUZ), Ijuí, RS, Brazil

### Supplementary material 1.

#### Supplementary methods:

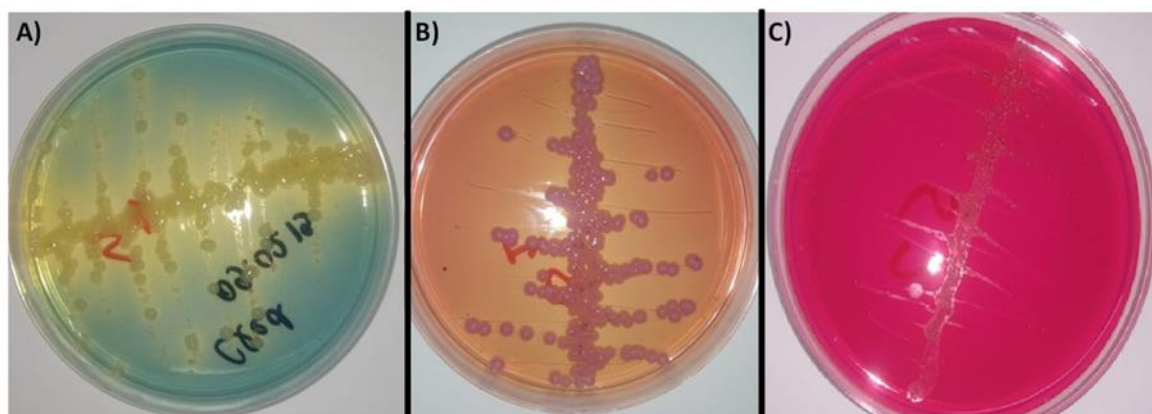

**Supplementary Figure 1.** Representative images from bacterial analyses of faecal solution administered in mice for sepsis induction. Faecal solution was prepared in sterile NaCl 0.9% solution (100 mg/ml). Bacterial colonies were analysed by two independent evaluators. (A) In the Agar Cled medium (INTERLAB) (A) were identified colonies of *Escherichia coli* and *Staphylococcus aureus*. Thus, the CFU count were performed in (B) Agar MacConkey (HIMEDIA) and (C) Agar Sal mannitol IO053 (IONLAB) by incubation at 35 °C ( $\pm 2$ ) by 24 h. We found  $216 \pm 0.707$  colonies of *E. coli* and  $494 \pm 9.192$  of *S. aureus*. Since the sample volume used in this analysis was 50  $\mu$ L, representing five milligrams of faeces and was administered at the dose of 1 mg/g per animal, we estimated that 43 CFUs/g of *E. coli* and 99 CFUs/g of *S. aureus* were i.p. administered for sepsis induction.

## Murine Sepsis Score (MSS) (SHRUM et al., 2014)

| Variable               | Score and description                                                                                                                                                                                                                                                                                                                                                                                                                   |
|------------------------|-----------------------------------------------------------------------------------------------------------------------------------------------------------------------------------------------------------------------------------------------------------------------------------------------------------------------------------------------------------------------------------------------------------------------------------------|
| Appearance             | 0- Coat is smooth<br>1- Patches of hair piloerected<br>2- Majority of back is piloerected<br>3- Piloerection may or may not be present, mouse appears “puffy”<br>4- Piloerection may or may not be present, mouse appears emaciated                                                                                                                                                                                                     |
| Level of consciousness | 0- Mouse is active<br>1- Mouse is active but avoids standing upright<br>2- Mouse activity is noticeably slowed. The mouse is still ambulant.<br>3- Activity is impaired. Mouse only moves when provoked, movements have a tremor<br>4- Activity severely impaired. Mouse remains stationary when provoked, with possible tremor                                                                                                         |
| Activity               | 0- Normal amount of activity. Mouse is any of: eating, drinking, climbing, running, fighting<br>1- Slightly suppressed activity. Mouse is moving around bottom of cage<br>2- Suppressed activity. Mouse is stationary with occasional investigative movements<br>3- No activity. Mouse is stationary<br>4- No activity. Mouse experiencing tremors, particularly in the hind legs                                                       |
| Response to stimulus   | 0- Mouse responds immediately to auditory stimulus or touch<br>1- Slow or no response to auditory stimulus; strong response to touch (moves to escape)<br>2- No response to auditory stimulus; moderate response to touch (moves a few steps)<br>3- No response to auditory stimulus; mild response to touch (no locomotion)<br>4- No response to auditory stimulus. Little or no response to touch. Cannot right itself if pushed over |
| Eyes                   | 0- Open<br>1- Eyes not fully open, possibly with secretions<br>2- Eyes at least half closed, possibly with secretions<br>3- Eyes half closed or more, possibly with secretions<br>4- Eyes closed or milky                                                                                                                                                                                                                               |
| Respiration rate       | 0- Normal, rapid mouse respiration<br>1- Slightly decreased respiration (rate not quantifiable by eye)<br>2- Moderately reduced respiration (rate at the upper range of quantifying by eye)<br>3- Severely reduced respiration (rate easily countable by eye, 0.5 s between breaths)<br>4- Extremely reduced respiration (>1 s between breaths)                                                                                         |
| Respiration quality    | 0- Normal<br>1- Brief periods of laboured breathing<br>2- Laboured, no gasping<br>3- Laboured with intermittent gasps<br>4- Gasping                                                                                                                                                                                                                                                                                                     |

**Supplementary data:**

Original immunoblots images supplementary information of figure 6d (HSP70 / $\beta$ -actin expression in lung of mice).

Bands represents HSP70 expression in the lung of mice.

The sequence of the Blots is Control; Sepsis and Sepsis+eHSP72 (repeatedly)

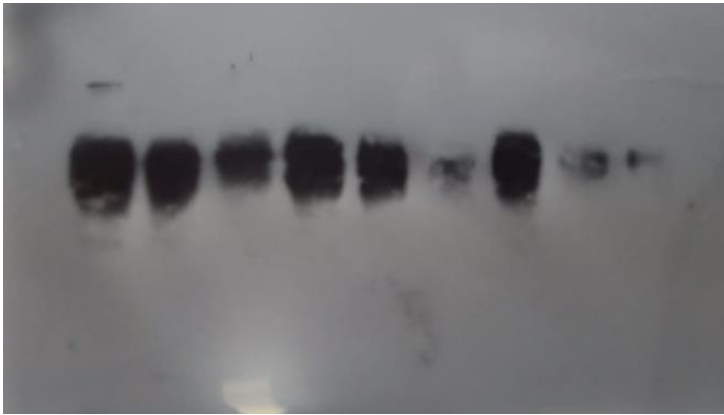

Bands represents HSP70 expression in the lung of mice.

The sequence of the Blots is Control; Sepsis and Sepsis+eHSP72 (repeatedly)

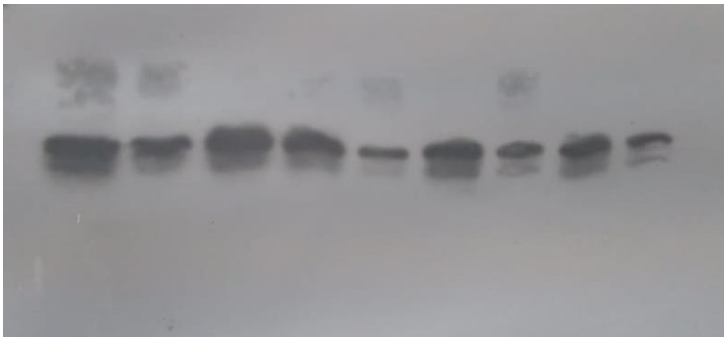

Supplement: 41598_2020_66011_MOESM1_ESM.pdf [file 41598_2020_66011_MOESM1_ESM.pdf]
